# Supplementary material for: An Integrated In Silico, In Vitro and Tumor Tissues Study Identified Selenoprotein S (SELENOS) and Valosin-Containing Protein (VCP/p97) as Novel Potential Associated Prognostic Biomarkers in Triple Negative Breast Cancer
Source: MDPI journal article supplement (doi:10.3390/cancers14030646), 2022-01-27
Supplement: s1 [file s1]

# Supplementary Materials: An Integrated In Silico, In Vitro and Tumor Tissues Study Identified Selenoprotein S and Valosin-Containing Protein (VCP/p97) as Novel Potential Associated Prognostic Biomarkers in Triple Negative Breast Cancer

Susan Costantini, Andrea Polo, Francesca Capone, Marina Accardo, Angela Sorice, Rita Lombardi, Palmina Bagnara, Federica Zito Marino, Martina Amato, Michele Orditura, Maddalena Fratelli, Gennaro Ciliberto and Alfredo Budillon.

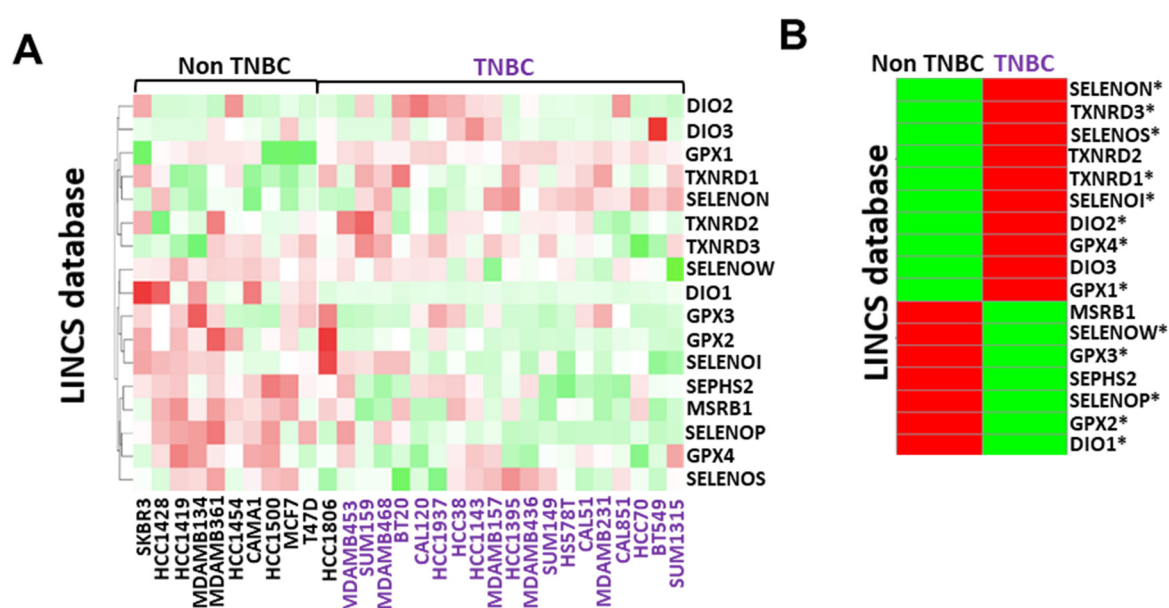

**Figure S1.** Comparison between the gene expression profiles of each selenoprotein in breast cancer cell lines subdivided between TNBC and “Non TNBC” sub-groups and their related mean expression profiles by clustering analysis obtained using RNAseq data in LINC dataset (A and B). Color scale from green to red refers to lower and higher gene expression levels of selenoproteins, respectively. We evidenced with \* the selenoproteins that presented similar expression trend in both CCLE and LINC datasets.

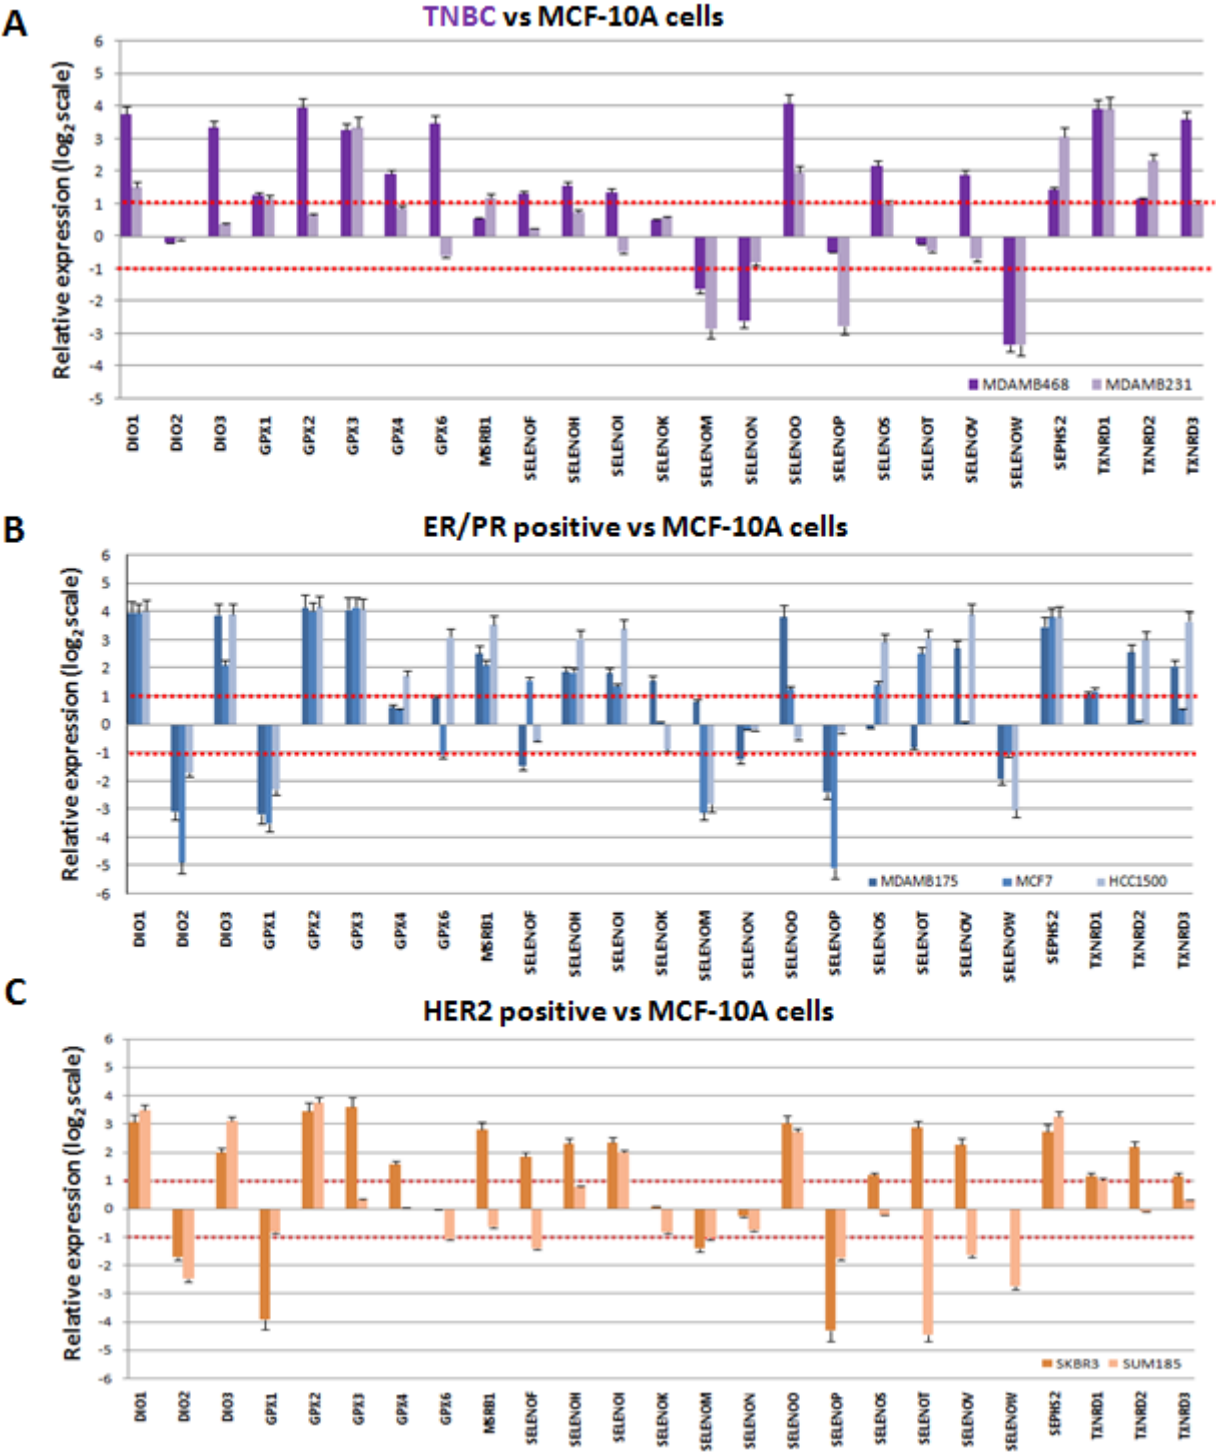

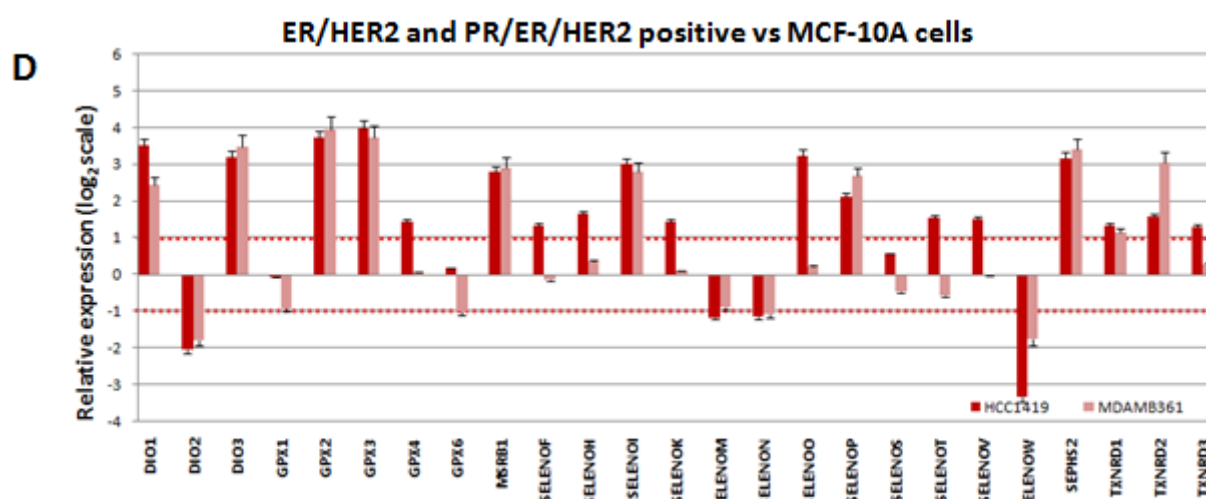

**Figure S2.** Fold change of gene expression levels for each selenoprotein (**A**) in two TNBC cell lines (MDAMB468 and MDAMB231), (**B**) in three ER/PR positive cells (MCF7, MDAMB175 and HCC1500), (**C**) in two HER2 positive cells (SKBR3 and SUM185), and (**D**) in two ER/HER2 and PR/ER/HER2 positive cell lines (HCC1419 and MDAMB361) compared to the non-cancerous MCF-10A cells, evaluated by  $2^{-\Delta\Delta C_q}$  method and reported as  $\log_2$  scale. We consider statistically significant the values higher and lower than +1 and -1, respectively.

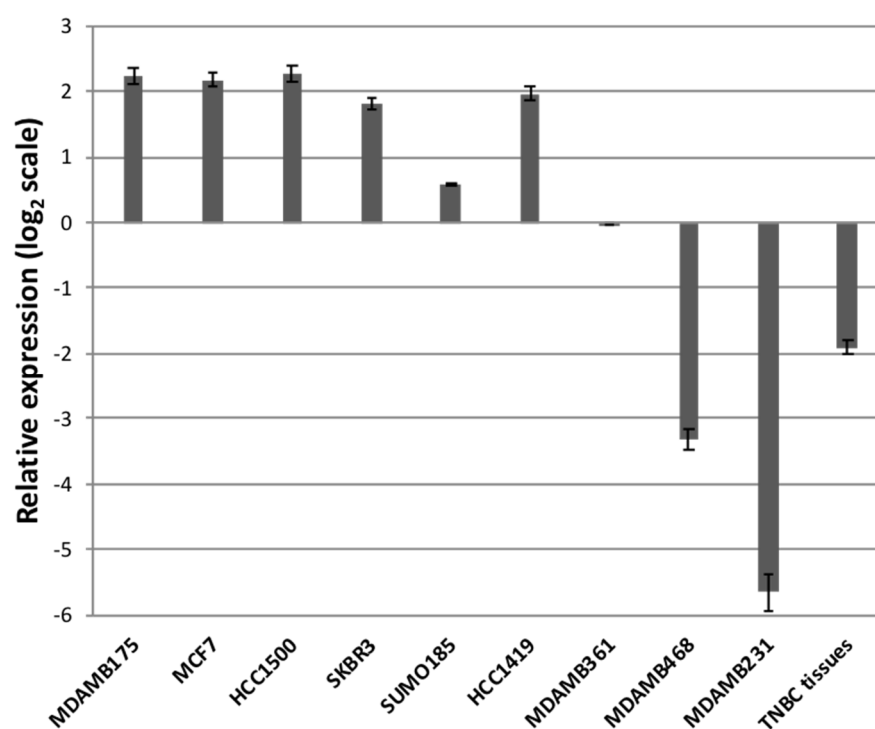

**Figure S3.** Fold change of expression levels for SELENBP1 mRNA in all breast cancer cell lines compared to MCF-10A cells and in TNBC tissues compared to the normal counterparts, evaluated by  $2^{-\Delta\Delta C_q}$  method and reported as  $\log_2$  scale. We consider statistically significant the values higher and lower than +1 and -1, respectively.

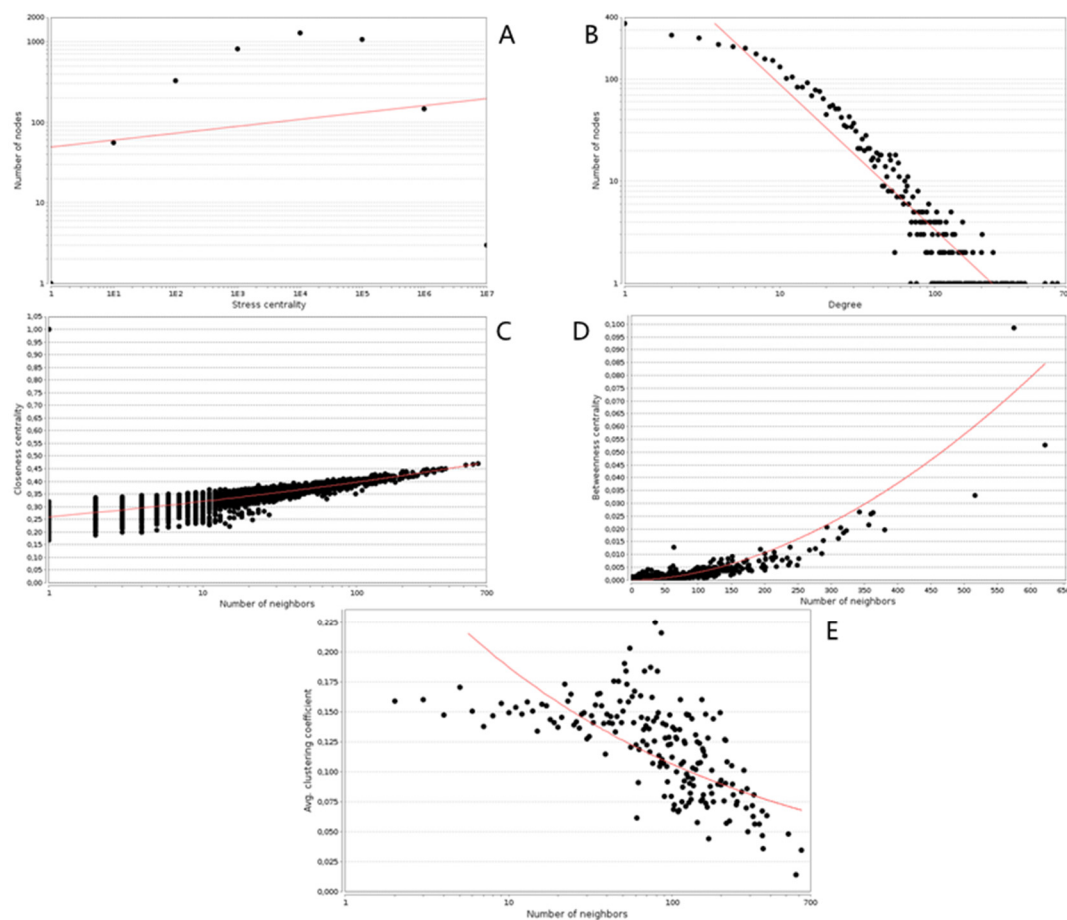

**Figure S4.** Evaluation of topological properties of TNBC network. (A) stress centrality, (B) node degree distribution, (C) closeness centrality, (D) betweenness centrality measure and (E) average clustering coefficient.

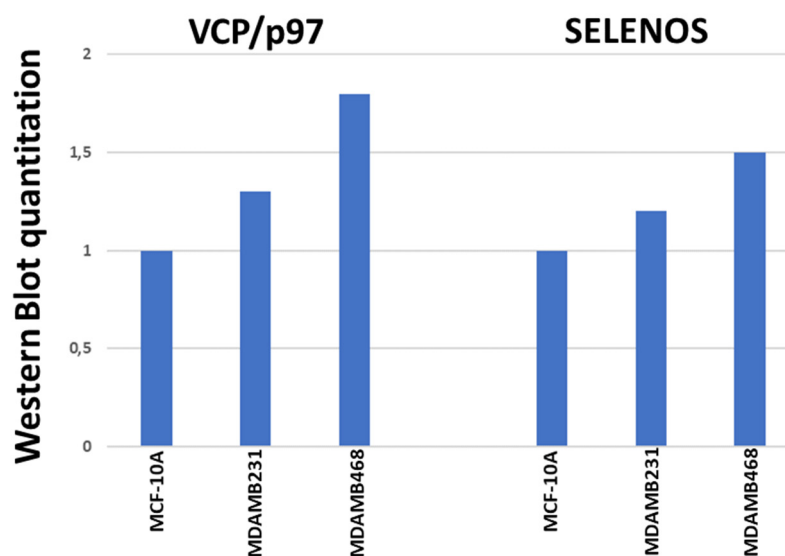

**Figure S5.** We show as an expression graph the quantifications performed for VCP/p97 and SELENOS by Western blot plots using IMAGEJ software.

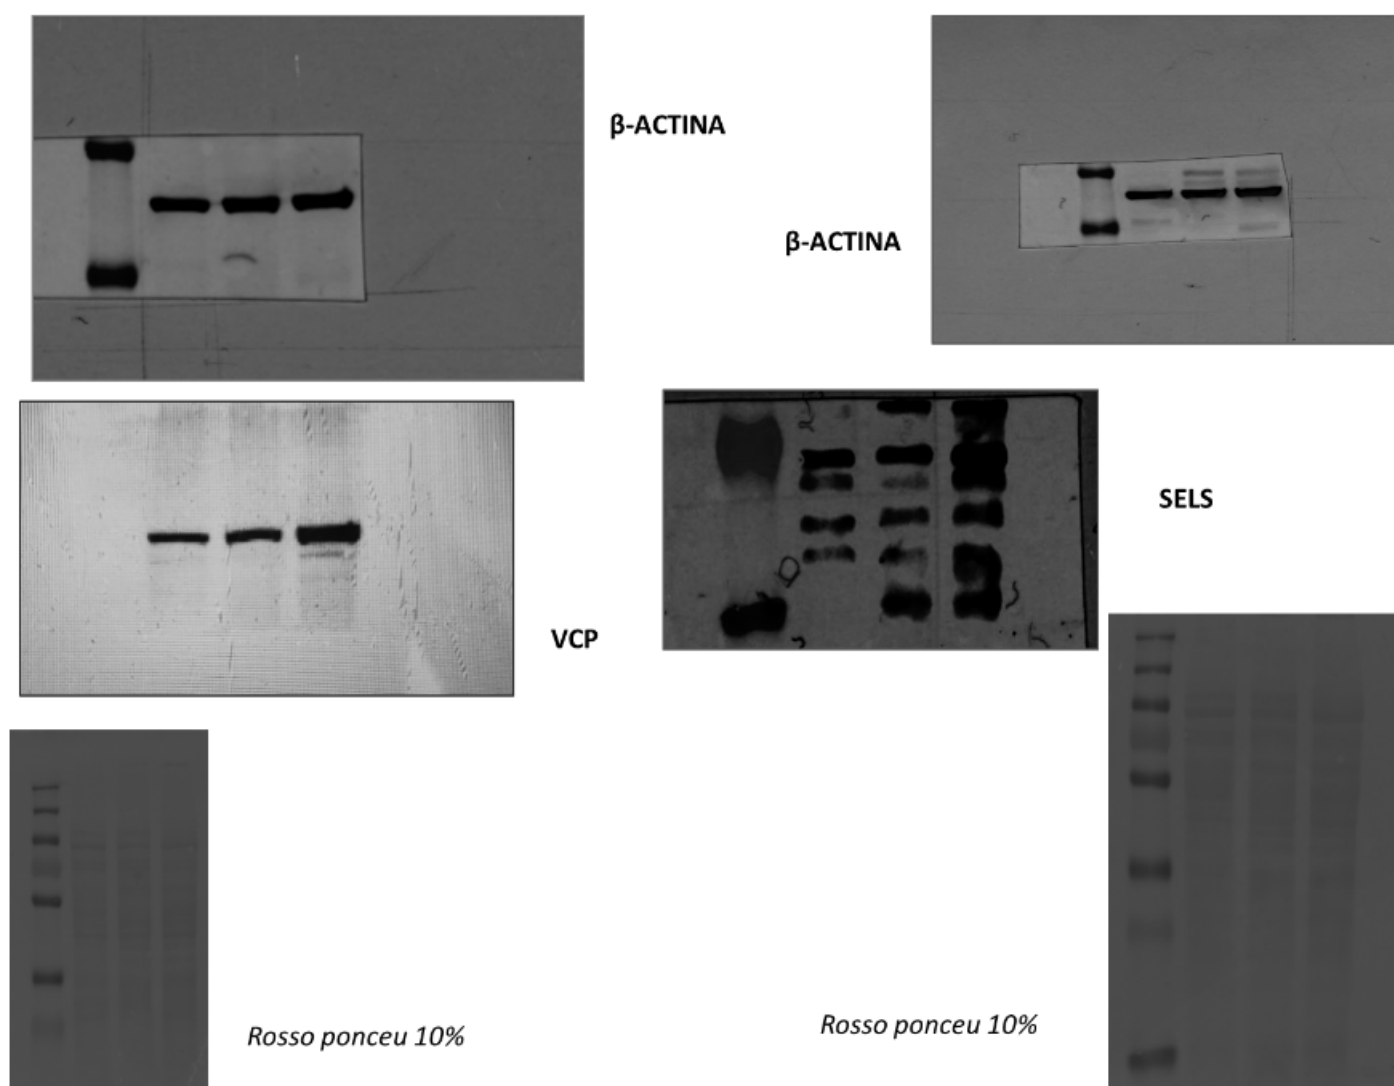

**Figure S6.** We report the original uncropped Western Blots of Figure 4B.

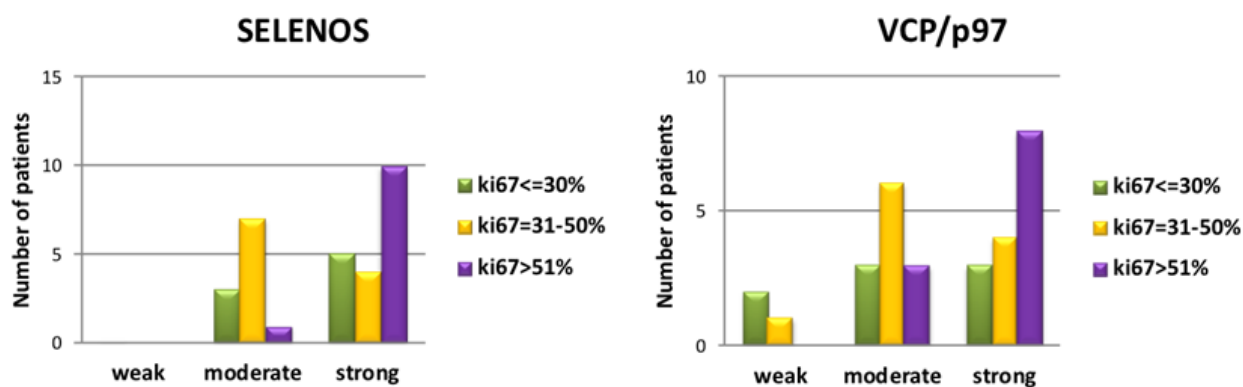

**Figure S7.** Correlation between SELENOS and VCP/p97 expression and ki67. Number of patients with gradual SELENOS and VCP raise expression (indicated as weak, moderate and strong) are reported respect to different ki67 values.

**Table S1.** List of primer sequences.

| Gene            | Melting Temperature (°C) | Sequence 5'→3'                                            |
|-----------------|--------------------------|-----------------------------------------------------------|
| <i>DIO1</i>     | 59.8                     | AGCTTACTCTGGCTTTGCCGA (21)<br>TATTACCCGTCTTCTCGCCCA (21)  |
| <i>DIO2</i>     | 59.8                     | CTTACTCTGGCTTTGCCGAGA (21)<br>CAGGATGTTCCGCTTGACTCT (21)  |
| <i>DIO3</i>     | 59.8                     | GGTAGTTTCCCCCGCTTGTTT (21)<br>TTTAGGTGCTGCTTTGAGGCC (21)  |
| <i>GPX1</i>     | 59.8                     | TTATGACCGACCCCAAGCTCA (21)<br>ATGTCAATGGTCTGGAAGCGG (21)  |
| <i>GPX2</i>     | 57.3                     | GGAGAATGAACCCAAGCGAA (20)<br>CAGGTTTGTACAGCCAGTGAT (22)   |
| <i>GPX3</i>     | 59.8                     | TCTCATCCCATGTCCACCATG (21)<br>TGCATCCATTGTGCCAGG (19)     |
| <i>GPX4</i>     | 59.8                     | AGAGATCAAAGAGTTCGCCGC (21)<br>TCTTCATCCACTTCCACAGCG (21)  |
| <i>GPX6</i>     | 59.8                     | CAGAAACCCACCTCACATGA (21)<br>TGCCATGACCTGAATGCACT (20)    |
| <i>MSRB1</i>    | 59.8                     | AGCGGCTGTTGCTCCATAACT (21)<br>ATTCAGCATCACCCACCCTC (21)   |
| <i>SELENBP1</i> | 61.4                     | GGGAGGTACATGGTCAGTGG (20)<br>GGAAGAGCTGTCCTGTGAGG (20)    |
| <i>SELENOF</i>  | 59.8                     | ATCGGAGGCATGCAGAGAGTT (21)<br>TCTGCAATCAGGATCCAGCTG (21)  |
| <i>SELENOH</i>  | 57.9                     | GGTGGTGAAGAGTTGAAGAA (21)<br>AGGGACACAAAGCTCAGCAT (20)    |
| <i>SELENOI</i>  | 56.7                     | AAAGGCCAGGTTCCCAGAA (19)<br>CAATCCTGCTGCAGTCCAAGT (21)    |
| <i>SELENOK</i>  | 57.3                     | AATCAATCATCTGCGTGCC (20)<br>TGGTCAGCCTTCCACTTCTTG (21)    |
| <i>SELENOM</i>  | 57.9                     | TCACGCAGGACATTCCATTCT (21)<br>CCTGCACTAGCGCATTGATCT (21)  |
| <i>SELENON</i>  | 59.8                     | AGGCAGATGCTCATTGTTCCC (21)<br>CCCCAAATCCAGATGCAGACT (21)  |
| <i>SELENOO</i>  | 59.8                     | CGGTTGTGTTGCGTGTAGCTT (21)<br>TGCACTCGAATGTCGTTCCCTC (21) |
| <i>SELENOP</i>  | 59.8                     | TAGGAGCTGATGCTGCCATTG (21)<br>ATGTTCTCCTCTGCCCCAAGT (21)  |
| <i>SELENOS</i>  | 59.8                     | CAGCTGCTCGACTGAAAATGC (21)<br>GCATGCTGTCCCACATTTCAA (21)  |
| <i>SELENOT</i>  | 57.9                     | TCAATCCCACACCATCGATCA (21)<br>ACAACGAGCCTGCCAAGAAAG (21)  |
| <i>SELENOV</i>  | 57.9                     | GTGGATTCGTCATTTCATG (21)<br>TTTGAGTCTGACTGCCATCCC (21)    |
| <i>SELENOW</i>  | 59.8                     | GTTTATTGTGGCGCTTGAGGC (21)<br>CCATCACTTCAAAGAACCCGG (21)  |
| <i>SEPHS2</i>   | 57.3                     | CGGCTCGCTTTTGTCTGAA (20)<br>TCGCGGCTTGTCATGATC (19)       |
| <i>TXNRD1</i>   | 57.9                     | CACAATTGGAATCCACCCTGT (21)<br>GGTTTGCACTCTTGCAACA (20)    |
| <i>TXNRD2</i>   | 57.9                     | AGGACATTTGCTGGTCGAAGC (21)<br>GGAATCCCCTGAAAAACGTT (21)   |

|                |      |                               |
|----------------|------|-------------------------------|
| <i>TXNRD3</i>  | 57.9 | CCTTTCCCAGTTGCTAGTGC (20)     |
|                |      | GTGCTACACTCTGGCAACA (20)      |
| <i>VCP</i>     | 57   | GCCTTGAATGAAGTAGGTAT(21)      |
|                |      | GTTGGGTCTGTTGGTTGC (18)       |
| <i>β-actin</i> | 59.8 | TCTGGCACCACACCTTCTACAATG (24) |
|                |      | AGCACAGCCTGGATAGCAACG (21)    |

**Table S2.** Functional analysis performed by STRING tool (<https://string-db.org/>, accessed on 1 May 2020) on five significant selenoproteins (GPX1, GPX4, SELENOS, TXNRD1 and TXNRD3). In the table we report the molecular function, biological Process and Reactome and Kegg Pathways in which these selenoproteins are involved, and the number and the list of involved selenoproteins.

|                                                              | Number | List of Involved Selenoproteins     |
|--------------------------------------------------------------|--------|-------------------------------------|
| <b>Molecular Function (GO)</b>                               |        |                                     |
| antioxidant activity                                         | 5      | GPX1, GPX4, SELENOS, TXNRD1, TXNRD3 |
| glutathione peroxidase activity                              | 2      | GPX1, GPX4                          |
| oxidoreductase activity                                      | 4      | GPX1, GPX4, TXNRD1, TXNRD3          |
| thioredoxin-disulfide reductase activity                     | 2      | TXNRD1, TXNRD3                      |
| protein disulfide oxidoreductase activity                    | 2      | TXNRD1, TXNRD3                      |
| flavin adenine dinucleotide binding                          | 2      | TXNRD1, TXNRD3                      |
| electron transfer activity                                   | 2      | TXNRD1, TXNRD3                      |
| <b>Biological Process (GO)</b>                               |        |                                     |
| cellular oxidant detoxification                              | 5      | GPX1, GPX4, SELENOS, TXNRD1, TXNRD3 |
| response to oxidative stress                                 | 5      | GPX1, GPX4, SELENOS, TXNRD1, TXNRD3 |
| cell redox homeostasis                                       | 3      | SELENOS, TXNRD1, TXNRD3             |
| oxidation-reduction process                                  | 4      | GPX1, GPX4, TXNRD1, TXNRD3          |
| negative regulation of inflammatory response                 | 2      | GPX1, SELENOS                       |
| lipxygenase pathway                                          | 2      | GPX1, GPX4                          |
| response to reactive oxygen species                          | 3      | GPX1, TXNRD1, TXNRD3                |
| response to oxygen radical                                   | 2      | TXNRD1, TXNRD3                      |
| cellular response to oxidative stress                        | 3      | GPX1, SELENOS, TXNRD1               |
| response to inorganic substance                              | 3      | GPX1, TXNRD1, TXNRD3                |
| negative regulation of intrinsic apoptotic signaling pathway | 2      | GPX1, SELENOS                       |
| response to oxygen containing compound                       | 4      | GPX1, SELENOS, TXNRD1, TXNRD3       |
| fatty acid derivative metabolic process                      | 2      | GPX1, GPX4                          |
| electron transport chain                                     | 2      | TXNRD1, TXNRD3                      |
| negative regulation of programmed cell death                 | 3      | GPX1, GPX4, SELENOS                 |
| multi-organism process                                       | 4      | GPX1, GPX4, SELENOS, TXNRD3         |
| <b>KEGG Pathways</b>                                         |        |                                     |
| Glutathione metabolism                                       | 2      | GPX1, GPX4                          |
| <b>Reactome Pathways</b>                                     |        |                                     |
| Detoxification of reactive oxygen species                    | 2      | GPX1, TXNRD1                        |
| Synthesis of eicosatetraenoic acid                           | 2      | GPX1, GPX4                          |
| Metabolism of nucleotides                                    | 2      | GPX1, TXNRD1                        |
| Metabolism of lipids                                         | 3      | GPX1, GPX4, TXNRD1                  |
| <b>Molecular Function (GO)</b>                               |        |                                     |
| antioxidant activity                                         | 5      | GPX1, GPX4, SELENOS, TXNRD1, TXNRD3 |

**Table S3.** Detailed analysis of the statistical centrality and topological measures on the networks.

| Statistical Analysis        |       |
|-----------------------------|-------|
| Network centralization      | 0.144 |
| Network density             | 0.05  |
| Network heterogeneity       | 1.729 |
| Characteristic path length  | 3.166 |
| Clustering coefficient      | 0.135 |
| Average number of neighbors | 21.55 |
